# Supplementary material for: Development of a Web-Based and Mobile App to Support Physical Activity in Individuals With Rheumatoid Arthritis: Results From the Second Step of a Co-Design Process
Source: PubMed Central journal article supplement (PMC4342685; doi:10.2196/resprot.3795), 2015-02-09
Supplement: resprot_v4i1e22_app1.pdf [file resprot_v4i1e22_app1.pdf]

## 1. Recording: goal setting, planning and self-monitoring of physical activity performance and health status

| Features <sup>a</sup>                                                                                                                                                                    | System requirements <sup>b</sup>                                                                                                     | BCT <sup>c</sup>                                                                                                                              | The App                                                                                                                                                        |
|------------------------------------------------------------------------------------------------------------------------------------------------------------------------------------------|--------------------------------------------------------------------------------------------------------------------------------------|-----------------------------------------------------------------------------------------------------------------------------------------------|----------------------------------------------------------------------------------------------------------------------------------------------------------------|
| <ul style="list-style-type: none"> <li>Setting interim goals to help achieve long term goals</li> <li>Individual long term goals</li> <li>SMART goal setting</li> </ul>                  | Provide information and instructions to enable the users to SMART (specific, measurable, accepted, realistic, time limited) goal set | <b>Goal-setting behavior</b><br>Code 1.1: Set or agree on a goal in terms of the behavior to be achieved                                      | <ul style="list-style-type: none"> <li>Features to support SMART goal setting including a calendar for physical activity planning</li> </ul>                   |
| <ul style="list-style-type: none"> <li>Activity planning</li> <li>Individualized exercise program to help achieve goals</li> <li>Help with and follow-up of activity planning</li> </ul> |                                                                                                                                      | <b>Action planning</b><br>Code 1.4: Prompt detailed planning of performance of the behavior                                                   |                                                                                                                                                                |
| <ul style="list-style-type: none"> <li>Record exercises performed</li> </ul>                                                                                                             | Provide the user with the possibility to record physical activities performed                                                        | <b>Self-monitoring of behavior</b><br>Code 2.3: Establish a method for the individual to monitor and record his or her behavior               | <ul style="list-style-type: none"> <li>A calendar feature for recording of physical activities performed</li> </ul>                                            |
| <ul style="list-style-type: none"> <li>Record well-being</li> <li>Perform and record the results of RA-specific physical tests</li> </ul>                                                | Provide the users with instructions to enable the users to perform RA-specific tests and record the outcome                          | <b>Self-monitoring of outcome</b><br>Code 2.4: Establish a method for the individual to monitor and record the outcome of his or her behavior | <ul style="list-style-type: none"> <li>A feature to support the performance and recording of RA- specific physical tests and self-rate health tests</li> </ul> |
| <ul style="list-style-type: none"> <li>Change goal according to well-being</li> <li>Change goal if set goal is not achieved</li> </ul>                                                   | Easy access for continuously reviewing and modifying set goals                                                                       | <b>Review behavior goal</b><br>Code 1.5: Review behavior goal jointly with the individual and consider modifying goals                        | <ul style="list-style-type: none"> <li>A feature available on the welcome screen to review set goal</li> </ul>                                                 |
| <ul style="list-style-type: none"> <li>Record exercise in the app same day</li> <li>Automatic registration of activities available in the app</li> </ul>                                 | Easy access for recording of physical activities performed                                                                           | <b>Self-monitoring of behavior (2.3)</b><br><b>Self-monitoring of outcome (2.4)</b>                                                           | <ul style="list-style-type: none"> <li>A feature available on the welcome screen to record the physical activity performed</li> </ul>                          |
| <ul style="list-style-type: none"> <li>Determine reward if goal is achieved</li> </ul>                                                                                                   | Provide information and instructions on how to determine individual rewards                                                          | <b>Material incentive</b><br>Code 10.1: Inform that valued objects will be delivered if effort/progress in performing the behavior            | <ul style="list-style-type: none"> <li>Features to support identification and recording of individual rewards</li> </ul>                                       |

<sup>a</sup>The participants' proposals on features retrieved from the on-line notice board, <sup>b</sup>What the app should provide, arrange or do, <sup>c</sup>BCTs as described and classified by Michie et al.,(2013)

## 2. Visualization: feedback personal and peers physical activity performances and health status.

| Features <sup>a</sup>                                                                                                                                                                                                                                                                        | System requirements <sup>b</sup>                                               | BCT <sup>c</sup>                                                                                                                           | The App                                                                                                                                                                                                          |
|----------------------------------------------------------------------------------------------------------------------------------------------------------------------------------------------------------------------------------------------------------------------------------------------|--------------------------------------------------------------------------------|--------------------------------------------------------------------------------------------------------------------------------------------|------------------------------------------------------------------------------------------------------------------------------------------------------------------------------------------------------------------|
| <ul style="list-style-type: none"> <li>To learn from own exercise behavior to reduce risk to fall back into old habits</li> <li>Show diagrams of physical activity goal achievement</li> <li>Show frequency of exercise</li> </ul>                                                           | Provide the users with feedback on physical activities performed               | <b>Feedback on behavior</b><br>Code 2.2: Monitor and provide informative or evaluative feedback on performance of the behavior             | <ul style="list-style-type: none"> <li>Features to provide visualized feedback on physical activities performed in relation to physical fitness and health and that are displayed as diagrams or bars</li> </ul> |
| <ul style="list-style-type: none"> <li>Show physical and mental well-being</li> <li>Being able to see what makes the exercise plan work or not at different times</li> <li>Visualize how exercise affects my health</li> <li>Self-rate current well-being to see change over time</li> </ul> | Provide the users with feedback on health outcome                              | <b>Feedback on outcome of behavior</b><br>Code 2.7: Monitor and provide feedback on the outcome of performance of the behavior             |                                                                                                                                                                                                                  |
| <ul style="list-style-type: none"> <li>Activity indicator based on self-tests</li> </ul>                                                                                                                                                                                                     | Provide the users with feedback on physical activities performed               | <b>Feedback on behavior (2.2)</b>                                                                                                          | <ul style="list-style-type: none"> <li>A status indicator showing ‘my health and/or physical activity’ status, eg., as traffic lights or percent</li> </ul>                                                      |
| <ul style="list-style-type: none"> <li>Health indicator based on self-tests</li> </ul>                                                                                                                                                                                                       | Provide the users with feedback on health outcome                              | <b>Feedback on outcome of behavior (2.7)</b>                                                                                               |                                                                                                                                                                                                                  |
| <ul style="list-style-type: none"> <li>Aim for indicator to show green light</li> </ul>                                                                                                                                                                                                      | Provide the users with prompts to stimulate physical activity                  | <b>Prompts/cues</b><br>Code 7.1: Introduce or define environmental or social stimulus with the purpose of prompting or cueing the behavior |                                                                                                                                                                                                                  |
| <ul style="list-style-type: none"> <li>Display status of group members</li> </ul>                                                                                                                                                                                                            | Arrange for the users to share physical activity performance and health status | <b>Social comparison</b><br>Code 6.2: Draw attention to others’ performances to enable comparison with the individuals’ own performance.   | <ul style="list-style-type: none"> <li>A feature to show peer group members, name, pictures/avatars and status in relation to physical activity goal achievement and physical activity performed</li> </ul>      |
| <ul style="list-style-type: none"> <li>Display planned exercise</li> </ul>                                                                                                                                                                                                                   | Visualization of planned physical activity                                     | <b>Prompts/cues (7.1)</b>                                                                                                                  | <ul style="list-style-type: none"> <li>A feature to visualize the next planned physical activity on the welcome screen</li> </ul>                                                                                |

<sup>a</sup> The participants’ proposals on features retrieved from the on-line notice board, <sup>b</sup> What the app should provide, arrange or do, <sup>c</sup> BCTs as described and classified by Michie et al.,(2013)

### 3. System alerts: receive reminders or rewards/punishments from the app

| Features <sup>a</sup>                                                                                                                                                                | System requirements <sup>b</sup>                                                          | BCT <sup>c</sup>                                                                                                                                                                                                                                         | The App                                                                                                                                                        |
|--------------------------------------------------------------------------------------------------------------------------------------------------------------------------------------|-------------------------------------------------------------------------------------------|----------------------------------------------------------------------------------------------------------------------------------------------------------------------------------------------------------------------------------------------------------|----------------------------------------------------------------------------------------------------------------------------------------------------------------|
| <ul style="list-style-type: none"> <li>Alert when planned exercise is not performed</li> </ul>                                                                                       | Enable the system to react to individuals not following the action plan                   | <p><b>Discrepancy between current behavior and goal</b><br/>Code 1.6: Draw attention to discrepancies between an individuals' current behavior and previously established outcome, behavioral goals or action plans</p> <p><b>Prompts/cues (7.1)</b></p> | <ul style="list-style-type: none"> <li>Features for the system to send reminders as text messages and e-mails based on the individual's action plan</li> </ul> |
| <ul style="list-style-type: none"> <li>Reminder in advance to exercise</li> </ul>                                                                                                    | Enable the system to send reminders to facilitate adherence to the action plan            |                                                                                                                                                                                                                                                          |                                                                                                                                                                |
| <ul style="list-style-type: none"> <li>Rewards at goal achievement or after reaching predetermined level of exercise intensity</li> <li>Receiving rewards from the system</li> </ul> | Enable the system to provide individual rewards                                           | <p><b>Non-specific incentive</b><br/>Code 10.6: Inform that a reward will be delivered if and only if there has been effort and/or progress in performing the behavior</p>                                                                               | <ul style="list-style-type: none"> <li>Features for system rewards, eg., medallions, stars</li> </ul>                                                          |
| <ul style="list-style-type: none"> <li>Receive negative response when not performing planned exercise</li> </ul>                                                                     | Arrange for the system to send "punishment" if planned physical activity is not performed | <p><b>Punishment</b><br/>Code 14.2: Arrange for aversive consequence</p>                                                                                                                                                                                 | <ul style="list-style-type: none"> <li>Features for system punishments, eg., send an angry face</li> </ul>                                                     |

<sup>a</sup>The participants' proposals on features retrieved from the on-line notice board, <sup>b</sup>What the app should provide, arrange or do, <sup>c</sup>BCTs as described and classified by Michie et al.,(2013)

#### 4. Social interaction: give and receive encouragements and support from individuals with RA.

| Features <sup>a</sup>                                                                                                                                                                                                                                                                                            | System requirements <sup>b</sup>                                                         | BCT <sup>c</sup>                                                                                                                           | The app                                                                                                      |
|------------------------------------------------------------------------------------------------------------------------------------------------------------------------------------------------------------------------------------------------------------------------------------------------------------------|------------------------------------------------------------------------------------------|--------------------------------------------------------------------------------------------------------------------------------------------|--------------------------------------------------------------------------------------------------------------|
| <ul style="list-style-type: none"> <li>Receive questions about previously performed exercises</li> <li>Receive specific suggestions for alternative exercise when in pain</li> <li>Receive help with self-analysis to choose appropriate level of exercise</li> <li>Letting off steam/vent with peers</li> </ul> | Peers being able to communicate with each other to help solve problematic situations     | <b>Problem solving</b><br>Code 1.2: Analyze, or prompt the person to analyze, factors influencing the behavior                             | <ul style="list-style-type: none"> <li>A chat feature</li> <li>Comment areas</li> </ul>                      |
| <ul style="list-style-type: none"> <li>Ask for encouragement</li> <li>Get reactions from peers when not exercising</li> </ul>                                                                                                                                                                                    | Peers being able to comment on physical activities performed/not performed               | <b>Social support (unspecified)</b><br>Code 3.1: Advise on, arrange or provide social support or non-contingent praise or reward           |                                                                                                              |
| <ul style="list-style-type: none"> <li>Receive tips and advice on exercise</li> <li>Ask for advice</li> </ul>                                                                                                                                                                                                    | Enable a supportive climate for peers to ask for and provide advice on physical activity | <b>Social support (practical)</b><br>Code 3.2: Advise on, arrange or provide practical help                                                |                                                                                                              |
| <ul style="list-style-type: none"> <li>Establish a relationship with the peer group</li> <li>See how my peers are doing</li> <li>Give or receive encouragement</li> </ul>                                                                                                                                        | Enable a supportive climate for peers to receive and provide emotional support           | <b>Social support (emotional)</b><br>Code 3.3 Advise on, arrange or provide emotional social support                                       |                                                                                                              |
| <ul style="list-style-type: none"> <li>Specific exercise suggestions</li> <li>Learn how peers exercise from their own accounts</li> </ul>                                                                                                                                                                        | Peers being able to provide specific exercise instructions                               | <b>Instructions on how to perform a behavior</b><br>Code 4.1: Advise or agree on how to perform the behavior (includes skills training)    |                                                                                                              |
| <ul style="list-style-type: none"> <li>Recommend favorite exercise to peers</li> <li>Give advice to peers in similar situations</li> </ul>                                                                                                                                                                       | Enable peers to share their own experiences of physical activity                         | <b>Identification of self as a role model</b><br>Code 13.1: Inform that one's own behavior may be an example to others                     |                                                                                                              |
| <ul style="list-style-type: none"> <li>Receive encouragement when performed exercise or reached goals</li> </ul>                                                                                                                                                                                                 | Provide peers with devices to send encouragements                                        | <b>Social reward</b><br>Code 10.4: Arrange verbal or non-verbal reward if there has been effort and/or progress in performing the behavior | <ul style="list-style-type: none"> <li>A feature for the possibility to send encouragements/likes</li> </ul> |

<sup>a</sup>The participants' proposals on features retrieved from the on-line notice board, <sup>b</sup>What the app should provide, arrange or do, <sup>c</sup>BCTs as described and classified by Michie et al.,(2013)

## 5. Facts and information: texts and links on physical activity in RA

| Features <sup>a</sup>                                                                                                 | System requirements <sup>b</sup>                                                                 | BCT <sup>c</sup>                                                                                                                                          | The app                                                                                                                                                        |
|-----------------------------------------------------------------------------------------------------------------------|--------------------------------------------------------------------------------------------------|-----------------------------------------------------------------------------------------------------------------------------------------------------------|----------------------------------------------------------------------------------------------------------------------------------------------------------------|
| <ul style="list-style-type: none"> <li>Tips on good exercises in everyday life</li> </ul>                             | Devices to facilitate short tips on good physical activities in everyday life                    | <b>Instructions on how to perform a behavior (4.1)</b><br><b>Prompts/cues (7.1)</b>                                                                       | <ul style="list-style-type: none"> <li>A feature available on the welcome screen to present short tips on good physical activities in everyday life</li> </ul> |
| <ul style="list-style-type: none"> <li>Information about positive health consequences of physical activity</li> </ul> | Provide the users with information on the positive health consequences of physical activity      | <b>Information about health consequences</b><br>Code 5.1: Provide information about health consequences of performing the behavior                        | <ul style="list-style-type: none"> <li>A feature to present up to date information on physical activity</li> </ul>                                             |
| <ul style="list-style-type: none"> <li>Reduce fear of movement</li> </ul>                                             | Provide information to reduce fear of movement                                                   | <b>Information about emotional consequences</b><br>Code 5.6: Provide information about emotional consequences of performing the behavior                  | <ul style="list-style-type: none"> <li>Access to links related to physical activity in RA, eg. the SRA <sup>d</sup></li> </ul>                                 |
| <ul style="list-style-type: none"> <li>Library of exercise films for different levels</li> </ul>                      | Provide the users with films and instructions on different physical activities                   | <b>Demonstration of the behavior</b><br>Code 6.1: Provide an observable sample of the performance of the behavior, for the person to aspire to or imitate | <ul style="list-style-type: none"> <li>A library with short films on physical activity on different levels.</li> </ul>                                         |
| <ul style="list-style-type: none"> <li>Receive information from a reliable source</li> </ul>                          | Provide information on who will supply the WeMApp and the intention and objectives of the WeMApp | <b>Credible source</b><br>Code 9.1: Present verbal or visual communication from a credible source                                                         | <ul style="list-style-type: none"> <li>A section containing this information</li> </ul>                                                                        |

<sup>a</sup>The participants' proposals on features retrieved from the on-line notice board, <sup>b</sup>What the app should provide, arrange or do, <sup>c</sup>BCTs as described and classified by Michie et al.,(2013), <sup>d</sup>Swedish Rheumatism Association
